# Supplementary material
Source: ML conference proceedings conference paper supplement (https://openreview.net/forum?id=K5j7D81ABvt)
Supplement: supplementary_material [file attachment]

## A SYNTHESIZING TRAINING DATA

The generating algorithm takes as input a set of symbols  $\text{Sym}$  (e.g. all MitM-symbols for which an alignment to SMGLoM exists) and a starting symbol  $s \in \text{Sym}$  (e.g. `nattimes`; binary multiplication on natural numbers). The algorithm then proceeds as follows:

1. If  $s : T$  has a (simple or dependent) function type, we fill in the required arguments. For  $s = \text{nattimes}$ , our type is  $T = \text{Nat} \rightarrow \text{Nat} \rightarrow \text{Nat}$ , hence we need to find two arguments  $s_1, s_2$  of type  $\text{Nat}$ . For each  $s_i$  of required type  $T_i$  we proceed as follows:
  - (a) With probability  $p_{var}$ , we introduce a new variable  $v : T_i$  from a list of allowed variable names (which include variants such as  $a, a', a_0$  etc.) and let  $s_i := v$ .
  - (b) With probability  $p_{fun}$ , we pick a symbol  $f \in \text{Sym}$  with a function type with return type  $T_i$  (e.g. for  $T_i = \text{Nat}$ , we can pick `natplus`). In that case, we let  $s := f$ , recurse, and set  $s_i$  as the result.
  - (c) With probability  $p_{const} = 1 - p_{var} - p_{fun}$ , we pick a constant symbol  $c \in \text{Sym}$  of type  $T_i$  (e.g. for  $T_i = \text{Nat}$  we can pick 0) and return  $s_i := c$ .

In order to avoid stack overflows, we reduce  $p_{fun}$  in each iteration by a certain factor  $< 1$ . As to not overuse certain symbols, we scale  $p_{fun}$  and  $p_{const}$  with the number of respectively suitable symbols available; if  $\text{Sym}$  contains no suitable function or constant symbols, we let  $p_{fun} = 0$  (and/or  $p_{const} = 0$ , respectively).

2. If  $s : T$  does *not* have a function type (or all its parameters have been filled in 1.), then  $s$  is well-typed and we return  $s$  with probability  $1 - p_{up}$ .

With probability  $p_{up}$ , we instead pick a new symbol  $s_f \in S$  of some function type such that some  $i$ -th parameter type of  $s_f$  is  $T$ . In that case, we let  $s_i := s$  and  $s := s_f$  and recurse.

Again, in order to avoid stack overflows we reduce  $p_{up}$  by some factor with each iteration.

The algorithm also takes subtyping into account, e.g. whenever a term of type `Real` is required, terms of type `Int` or `Nat` are used with some probability.

In order to obtain a sentence in the sense of Section 5 providing context for disambiguation, we first translate  $t$  along alignments to SMGLoM (using a random `\symvariant`), collect the set  $V$  of all free variables of  $t$  and *verbalize* their types. For that, we associate each *type* with a set of *verbalizations* from which we choose randomly to produce a sentence that introduces the variables before using them in the generated expression. Figure 3 shows a few example verbalizations for a variable  $x$  of type `Nat` and generated sentences for the input symbol  $s = \text{realuminum}$ ; the negation on real numbers.

The verbalizations are categorized as *prefixed* (e.g. “a natural number  $n$ ”) or *suffixed* (e.g. “ $n$  a natural number”), and *singular* or *plural*, and picked according to the number of variables of the same type and the surrounding sentence, which is also picked at random (e.g. “Assume we have ...” uses prefixed, whereas “Let ...” uses suffixed).

## B EVALUATION TACTICS

For every `LaTeX` input  $S_{\text{LaTeX}}$ , expected label  $S_{\text{sTeX}}$  and returned sentence  $S_R$ , we employ the following strategies, the results of which are summarized in Figure 4:

`islatex` We parse  $S_R$  into an AST. Success implies that  $S_R$  is syntactically valid `LaTeX`. This might fail for “minor” reasons such as a missing closing bracket. It might yield false positives in cases where macros (not explicitly considered by our parser) occurring in  $S_R$  have a wrong number of arguments.

All subsequent evaluation strategies require `islatex` to succeed.

`stexcheck` We heuristically check whether  $S_R$  is in  $\mathcal{L}_{\text{sTeX}}$  – unlike `islatex`, this requires that all `sTeX` macros occurring in  $S_R$  have the right number of arguments. Success does *not* tell us that the input has been disambiguated *correctly*, but *does* imply that it *has* been disambiguated *at all*. False negatives can occur if  $S_R$  (and thus likely  $S_{\text{LaTeX}}$  as well)

|                | Generated sTeX                                                                                                                                                                                                                                                                                                                                                                                                                                                                                                                                                                                                                                                                                                                                                                                                                                                                                                                                                   | PDF output                                                                                                                                                                                                                                                                                                                                                                           |
|----------------|------------------------------------------------------------------------------------------------------------------------------------------------------------------------------------------------------------------------------------------------------------------------------------------------------------------------------------------------------------------------------------------------------------------------------------------------------------------------------------------------------------------------------------------------------------------------------------------------------------------------------------------------------------------------------------------------------------------------------------------------------------------------------------------------------------------------------------------------------------------------------------------------------------------------------------------------------------------|--------------------------------------------------------------------------------------------------------------------------------------------------------------------------------------------------------------------------------------------------------------------------------------------------------------------------------------------------------------------------------------|
| Verbalizations | $\text{\texttt{\$}\inset{x}\{\backslash\text{NaturalNumbers}\}\$}$<br>a positive integer $\text{\texttt{\$}x\$}$<br>an integer $\text{\texttt{\$}\intmethan{x}\{0\}\$}$<br>a natural number $\text{\texttt{\$}x\$}$                                                                                                                                                                                                                                                                                                                                                                                                                                                                                                                                                                                                                                                                                                                                              | $x \in \mathbb{N}$<br>a positive integer $x$<br>an integer $x \geq 0$<br>a natural number $x$                                                                                                                                                                                                                                                                                        |
| Sentences      | Assume we have some $\text{\texttt{\$}\inset{y'}\{\backslash\text{NaturalNumbers}\}\$}$ and arbitrary<br>$\text{\texttt{\$}\inset{\mathcal{F}}\{\backslash\text{IntegerNumbers}\}\$}$<br>It follows that $\text{\texttt{\$}\realminus{\realminus{\inttimes{x}\{\mathcal{F}, y', y'\}\}}\$}$ .<br><hr/> Let $\text{\texttt{\$}\natmorethan n\{0\}\$}$ . Then consider $\text{\texttt{\$}\realminus{\realminus{\natsucc{\natsucc n}\}}\$}$ .<br><hr/> Whenever we have some positive natural number $\text{\texttt{\$}\varepsilon\$,}$ any integer $\text{\texttt{\$}\livel{\mathcal{C}}\{2\}\$}$ , and a real number $\text{\texttt{\$}\livel{\mathcal{C}}\{2\}\$}$ , then it follows that $\text{\texttt{\$}\realtime{\livel{\mathcal{C}}\{2\}\$}$ , $\text{\texttt{\$}\livel{\mathcal{C}}\{2\}\$}$ , $\text{\texttt{\$}\livel{\mathcal{C}}\{2\}\$}$ , $\text{\texttt{\$}\realplus{\realminus{\ell}\$}$ , $\text{\texttt{\$}\natsucc{\varepsilon}\$}$ .<br><hr/> | Assume we have some $y' \in \mathbb{N}$ and arbitrary $\mathcal{F} \in \mathbb{Z}$ . It follows that $-(\mathcal{F} \times y' \times y')$ .<br><hr/> Let $n > 0$ . Then consider $-S(S(n))$ .<br><hr/> Whenever we have some positive natural number $\varepsilon$ , any integer $\ell$ and a real number $C_2$ , then it follows that $C_2 C_2 (-\ell + S(\varepsilon))$ .<br><hr/> |

Figure 3: Example Verbalizations for  $x : \text{Nat}$  and Generated Sentences

contains complex variable names, or if  $S_R$  contains e.g. an equality symbol “=” instead of the corresponding sTeX macro, which LaTeXML could recover.

**eval\_latex** All sTeX macros occurring in  $S_R$  are expanded and  $S_R$  is normalized as described in Section 5. The result is string-compared to  $S_{\text{TeX}}$ . Success thus implies, that the notational presentation in PDF output of  $S_{\text{TeX}}$  and  $S_R$  will coincide. False negatives can occur due to minor differences e.g. in not strictly necessary brackets.

**omdoc**  $S_R$  is translated to OMDOC using LaTeXML and imported to MMT. Success guarantees syntactic well-formedness of  $S_R$ . Since both the LaTeXML-OMDOC export and the subsequent MMT-import are somewhat brittle, this can easily lead to false negatives.

**translated** The import from omdoc is translated to the typed MitM library. This entails that all symbols used in  $S_R$  are aligned with MitM symbols and  $S_R$  is amenable for formal knowledge management services.

**inferred** The translation to MitM obtained from translated is type checked by MMT by having its type inferred. Success guarantees that  $S_R$  is well-typed.

Notably, if  $S_R$  is a mere variable (e.g. the expression  $\text{\texttt{\$}n\$}$ ), it does not actually have an inferrable type, but succeeds trivially. This accounts for 60 of the entries in our evaluation set, i.e. 37%.

**provided\_stex** Both the expected label  $S_{\text{TeX}}$  and  $S_R$  are normalized and string-compared. Success implies that  $S_R$  is definitely the correct translation. False negatives can easily occur due to non-semantic differences between  $S_{\text{TeX}}$  and  $S_R$  however, such as bracketing, nested applications in  $S_R$  (e.g.  $\text{\texttt{\$}\natplus{\natplus{a,b},c}\$}$  vs.  $\text{\texttt{\$}\natplus{a,b,c}\$}$ ), etc.

**stex\_as\_omdoc**  $S_{\text{TeX}}$  is translated to OMDOC via LaTeXML and directly compared to the OMDOC-term obtained from omdoc. Like provided\_stex, success implies that  $S_R$  is correct, but it is more fault-tolerant with respect to the precise syntax of  $S_R$ , while being less fault tolerant due to the issues mentioned in omdoc.

The first three evaluations can always be applied; from the remaining, all but provided\_stex require a working installation of LaTeXML and its sTeX-Plugin. The last two require a known correct translation.

|                     |        |
|---------------------|--------|
| <i>Total inputs</i> | 161    |
| islatex             | 96.9%  |
| stexcheck           | 60.2%  |
| eval_latex          | 64.0 % |
| omdoc               | 76.4%  |
| translated          | 63.5%  |
| inferred            | 59.6%  |
| provided_stex       | 47.2 % |
| stex_as_omdoc       | 53.4 % |

Figure 4: Results on our Evaluation Document

A detailed log file on our evaluation document with the individual results for each input and evaluation is available in the associated git repository.
